# Supplementary material for: The Putative Role of the NAC Transcription Factor EjNACL47 in Cell Enlargement of Loquat (Eriobotrya japonica Lindl.)
Source: MDPI journal article supplement (doi:10.3390/horticulturae7090323), 2021-09-17
Supplement: s1 [file s1]

## Supplementary Information:

**Supplementary Table S1. Gene-specific primers used in isolation of *EjNACL47* genes and vector construction.**

| Primer name           | Primer sequence (5'-3')                    |
|-----------------------|--------------------------------------------|
| DN242232-F            | GACCAAGGCTTTGCAGGTTC                       |
| DN242232-R            | GAGGATGCAAAACCCAGAATC                      |
| P2300-EjNACL47-eGFP-F | cggggtaccATGGAAGATGTGGAGATGGAG             |
| P2300-EjNACL47-eGFP-R | cgcggatccCCAATCACTATAAAGCAATGAATCACC       |
| pGBKT7-EjNACL47-F     | catggaggccgaattcccGAGGATGCAAAACCCAGAATC    |
| pGBKT7-EjNACL47-R     | aggtcgacggatccccGACCAAGGCGACCAAGGCTTT      |
| pGBKT7-EjNACL47-N-R   | ggtcgacggatccccTAAATCTTTGAGCTTCATGGC       |
| pGBKT7-EjNACL47-C-F   | tggccatggaggccgaattcTCCATGAGGTGGGATGATT    |
| pGBKT7-EjNACL47-C-R   | cgtctcaggtcgacggatccGACCAAGGCGACCAAGGCTTT  |
| PLGN-EjNACL47-F       | ggtaccatgtcgacgggcccGACCAAGGCTTTGCAGGTTC   |
| PLGN-EjNACL47-R       | gtacggatccgtactagtcccGAGGATGCAAAACCCAGAATC |

**Supplementary Table S2. Gene-specific primers used in RT-PCR analysis.**

| Primer name  | Primer sequence (5'-3')            |
|--------------|------------------------------------|
| q-EjNACL47-F | TATTGGAAGGCAACCGGAAC               |
| q-EjNACL47-R | AGATTGACAAAGAACCCAA                |
| q-EjActin-F  | AATGGAAGTGAATGGTCAAGGC             |
| q-EjActin-R  | TGCCAGATCTTCTCCATGTCATCCCA         |
| q-EjActin-F  | TATCGCTGACCGTATGAG                 |
| q-AtActin-R  | CTGAGGGAAGCAAGAATG                 |
| q-AtEXPA3-F  | TCCTTTCTCTTAACCGCAACAAAC           |
| q-AtEXPA3-R  | CCAATCTGTCTTTGATCCCTTTAC           |
| q-AtEXPB3-F  | TTCCAGTCATGTTAGCCACACTC            |
| q-AtEXPB3-R  | CGATCACACGAGTAGTAGTAATAGAAC        |
| q-AtEXPA8-F  | CAAGGAACTCATGGAGACGACGGAGGT        |
| q-AtEXPA8-R  | TGCTCTGCCAGTTTTGTCCCCAGTT          |
| q-AtEXPA10-F | TAACCGCTACAACTTCTGCCCCGCAAA        |
| q-AtEXPA10-R | ATATGGAAGAGAGATTAACCAACTTGCCCT     |
| q-AtEXPA11-F | TTATTGCGTTGATGCGTTTAG              |
| q-AtEXPA11-R | GACCACTGCCAATGATATTTTCATAC         |
| q-AtEXPA15-F | GGTCTTTTGGGAATTGCTCTGTT            |
| q-AtEXPA15-R | CCTAAACTATATAAAACCGAACTTGACTCA     |
| q-AtXTH8-F   | TTTGTTTTGAGTGTATTAAAGTGGAATG       |
| q-AtXTH8-R   | ATAAATAAACAGAGGATATAGTCCATAACAAAAT |
| q-AtXTH9-F   | ACCAACTGTCTCTGAGCTTAGCCT           |
| q-AtXTH9-R   | ATGATGTTGGCACTCAAGAGGA             |
| q-AtXTH16-F  | CCGGTAACTCCGCTGGAA                 |

|             |                                |
|-------------|--------------------------------|
| q-AtXTH16-R | TCTCGTCGTGTGTTGGTCCTT          |
| q-AtXTH17-F | ATGGGCTAATGGAAAATCATCTTGTT     |
| q-AtXTH17-R | TACTTTGCACACCTTTCATTCTTGTC     |
| q-AtXTH32-F | CATACCGTTCTGGCGGATTAA          |
| q-AtXTH32-R | CTTTGCAATAATTGTATACCATACTATGTG |

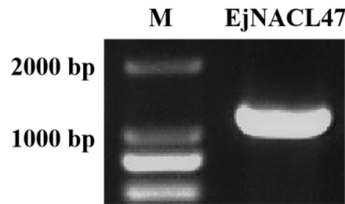

**Supplementary Figure S1.** Cloning of EjNACL47. M: Marker 2000.

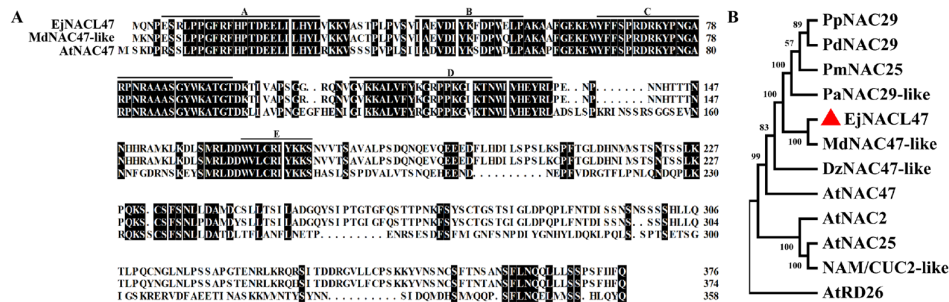

**Supplementary Figure S2.** Sequence analysis of EjNACL47. (A) Multiple sequence alignment of EjNACL47 with other NAC proteins. Gene codes are as follows: MdNAC47-like, XP028946255.1; AtNAC47, NP187057.2. Horizontal lines represent conserved NAC binding domains (five subdomains, A–E). Black shading represents conserved amino acid residues. (B) Phylogenetic analysis of EjNACL47. Phylogenetic analysis was performed using MEGA7.0 software with the neighbor-joining (NJ) method under 1000 bootstrap replicates. The analysis involved 12 amino acid sequences. ▲ represents EjNACL47.

| Sequences producing significant alignments:                         | Score<br>(bits) | E<br>Value |
|---------------------------------------------------------------------|-----------------|------------|
| GWHAAZU00000017#Chromosome 17#Complete=T#Circular=F#OriSeqID=LGI... | 1292            | 0.0        |
| GWHAAZU00000003#Chromosome 3#Complete=T#Circular=F#OriSeqID=L903... | 563             | e-158      |
| GWHAAZU00000001#Chromosome 1#Complete=T#Circular=F#OriSeqID=L901... | 88              | 3e-015     |
| GWHAAZU00000007#Chromosome 7#Complete=T#Circular=F#OriSeqID=L907... | 64              | 5e-008     |
| GWHAAZU00000002#Chromosome 2#Complete=T#Circular=F#OriSeqID=L902... | 64              | 5e-008     |
| GWHAAZU000000172#OriSeqID=Contig00301#Len=265256                    | 52              | 2e-004     |
| GWHAAZU000000132#OriSeqID=Contig00299_ERRORPOS333418#Len=333418     | 52              | 2e-004     |
| GWHAAZU00000013#Chromosome 13#Complete=T#Circular=F#OriSeqID=L91... | 50              | 7e-004     |
| GWHAAZU00000011#Chromosome 11#Complete=T#Circular=F#OriSeqID=L91... | 50              | 7e-004     |
| GWHAAZU00000004#Chromosome 4#Complete=T#Circular=F#OriSeqID=L904... | 50              | 7e-004     |

**Supplementary Figure S3.** The chromosome locations of EjNACL47.

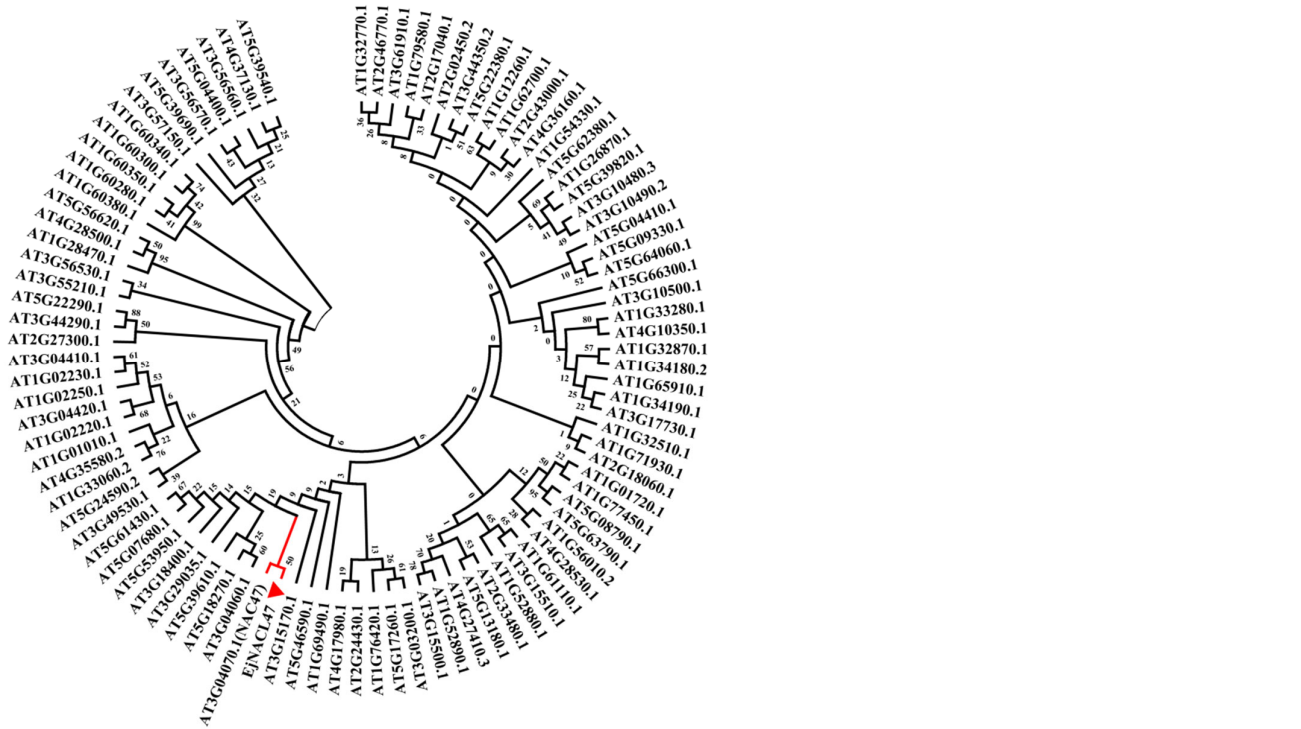

**Supplementary Figure S4.** Phylogenetic analysis of NAC members from loquat and Arabidopsis. Full length NAC protein sequences from Arabidopsis were downloaded from The Arabidopsis Information Resource (TAIR). ▲ represents EjNACL47.

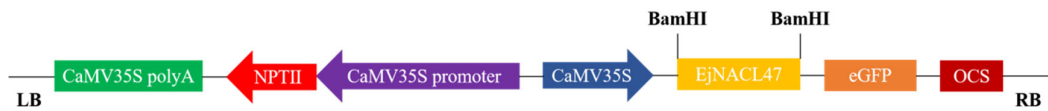

**Supplementary Figure S5** CaMV35S::EjNACL47-eGFP vector construction. LB: The left border of T-DNA; CaMV35S: promoter; RB: The right border of T-DNA; OCS: terminator; BamHI indicate multiple cloning sites for EjNACL47 insertion.

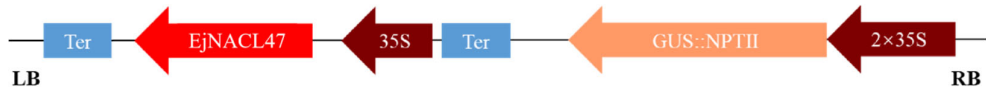

**Supplementary Figure S6.** PLGN-35S-EjNACL47-NOS-BE vector construction. LB: The left border of the T-DNA; Ter: Terminator; 35S: The CaMV 35S promoter; GUS::NPTII: The integration of GUS and NPTII gene; RB: The right border of the T-DNA

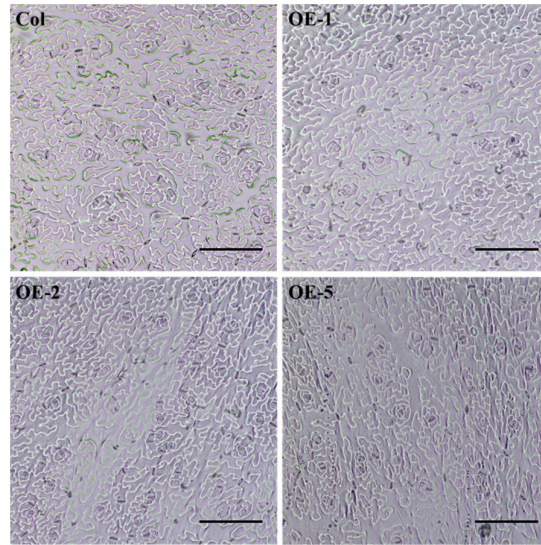

**Supplementary Figure S7.** *Lower epidermal cell changes of transgenic Arabidopsis. Scale bar: 200 $\mu$ m*
